1 NHEJ deficiency develops homologous recombination in poplar  
2 meaningfully further than the overexpression of HDR factors

3  
4 Ali Movahedi<sup>1§\*</sup>, Hui Wei<sup>1§</sup>, Zhong-Hua Chen<sup>2</sup>, Weibo Sun<sup>1</sup>, Jiaxin Zhang<sup>3</sup>, Dawei Li<sup>1</sup>, Liming  
5 Yang<sup>1\*</sup>, and Qiang Zhuge<sup>1\*</sup>

6  
7 <sup>1</sup> College of Biology and the Environment, Co-Innovation Center for Sustainable Forestry in  
8 Southern China, Key Laboratory of Forest Genetics & Biotechnology, Ministry of Education,  
9 Nanjing Forestry University, Nanjing 210037, China

10 <sup>2</sup> School of Science, Hawkesbury Institute for the Environment, Western Sydney University,  
11 Penrith, NSW 2751, Australia

12 <sup>3</sup> School of Food Science and Pharmaceutical Engineering, Nanjing Normal University, Nanjing  
13 210046, China

14  
15  
16 \*Correspondence should be addressed to Qiang Zhuge, Ali Movahedi, and Liming Yang: College  
17 of Biology and the Environment, Co-Innovation Center for Sustainable Forestry in Southern  
18 China, Key Laboratory of Forest Genetics & Biotechnology, Ministry of Education, Nanjing  
19 Forestry University, Nanjing 210037, China. E-mail: qzhuge@njfu.edu.cn;  
20 ali\_movahedi@njfu.edu.cn; yangliming@njfu.edu.cn; Fax: +86 25 85428701

21  
22 § These authors are equally as the first author

23  
24  
25 **Running title: *XRCC4* deficiency improves HDR efficiency about 50 times in poplar**

44 **Abstract**

- 45 • Efficient homology-directed DNA repair (HDR) is a vital difficulty confronting researchers to  
46 replace the target genome's desired fragment. In plants, scientists have performed meticulous  
47 investigations on herbal, crops, and citrus trees using HDR effector proteins, CtIP and MRE11,  
48 to obtain double-stranded breaks (DSBs) more precisely. Although HDR efficiency in plants  
49 previously has been reported, no record has been declared about HDR efficiency in poplars.
- 50 • Here, we hypothesized that inhibition of nonhomologous recombination cofactors XRCC4,  
51 together with enhancing the HDR pathway activities, enables us to generate the HDR efficiency  
52 in poplar trees. In this study, the *BleoR* gene was used to integrate into the interested site and  
53 develop resistant poplars against Zeocin antibiotics. We designed plasmids, including different  
54 fusions of HDR proteins and, together with the *XRCC4* target. Furthermore, real-time PCR,  
55 western blotting, RT-PCR, RT-qPCR, southern blotting, and DNA sequencing were applied to  
56 exhibit and evaluate HDR efficiency.
- 57 • While both applying HDR proteins and *XRCC4* deficiency simultaneously could improve HDR  
58 efficiency, which showed about 50 times more than usual editing by CRISPR-Cas9, the only  
59 using HDR proteins without *XRCC4* deficiency showed about 16 times more. We developed a  
60 new recombinant poplar genome to generate stable lines resistant to the Zeocin antibiotic.

61  
62 **Keywords:** CRISPR; XRCC4; Homologous recombination; BleoR; *Populus trichocarpa*

63  
64  
65  
66  
67  
68  
69  
70  
71  
72

## 73 **Introduction**

74           Precise, targeted genetic modification in trees has been challenging because of the  
75 efficient NHEJ factors and also the difficulty of delivery of template DNA for HDR into the cell  
76 nucleus. HDR has always been used to precisely repair DSBs, while NHEJs do the unexpected  
77 and irregular repair in the DSB area. NHEJ has shown a predominant pathway and occurs among  
78 the cell cycle widely (Panier & Boulton, 2014), while HDR rarely occurs (Puchta, 2005) because  
79 of the low efficiency of transferring DNA or RNA fragments into the cell nucleus resulting in  
80 difficulties to target and modify plant genomes accurately. Up to date, many studies have been  
81 carried out to improve the genetic modification of crops by HDR. For instance, one study has  
82 been carried out to increase *ARGOS8* expression by replacing the *GOS2* promoter via HDR to  
83 drive *ARGOS8* expression (Shi *et al.*, 2017). Another report showed a ten-fold enhancement in  
84 the efficiency of the insertion of the 35S promoter in upstream of the *ANTI* gene in tomato  
85 (Cermak *et al.*, 2015). Some researchers also exhibited the promotion in gene-targeting  
86 efficiency in potato (Butler *et al.*, 2016), tomato (Dahan-Meir *et al.*, 2018), rice (Sun *et al.*, 2016;  
87 Wang *et al.*, 2017), wheat (Gil-Humanes *et al.*, 2017), cassava (Hummel *et al.*, 2018), soybean  
88 (Li *et al.*, 2015), and maize (Svitashev *et al.*, 2015).

89           Although it has been previously reported using protoplasts for this purpose (Svitashev *et al.*  
90 *et al.*, 2016), the methods have been very inefficient. Concerning the difficulty of donor DNA  
91 template (DDT) delivery to the cell nucleus, the particle bombardment and virus-based replicons  
92 have been reported to increase this translocation, but the target relocation or replacement is still  
93 ongoing (Gil-Humanes *et al.*, 2017; Wang *et al.*, 2017). Therefore, this is one of the significant  
94 problems in the genetic modification of trees. Previous data indicated it is necessary to increase  
95 the number of cells containing DDTs at S/G2 cell division phases to increase HDR efficiency  
96 (Yang *et al.*, 2016). *Agrobacterium* has been widely used to transduce genes into plant cell nuclei  
97 (Movahedi *et al.*, 2015). This method was improved to increase transformation efficiency  
98 (Movahedi *et al.*, 2014). Still, there was no report on enhancing the *Agrobacteria* method  
99 delivery to increase the efficiency of transferring DDT and, consequently, the recovery of DSBs  
100 as HDR. Furthermore, the positive effects of recombinant homologous factors and their impact  
101 on enhancing HDR efficiency in mammals have already been reported (Tran *et al.*, 2019),  
102 with at least a 2-fold increase HDR and a 6-fold increase in HDR / NHEJ ratio. Cas9 integrates  
103 with MRE11, CtIP, and Rad51, Rad52, and promotes significant HDR efficiency in human cells

104 and decreases NHEJ (Tran *et al.*, 2019) significantly. On the other hand, inhibition of DNA  
105 ligase IV (LIG4), Ku 70, Ku 80, and XRCC4, which are known as the most critical NHEJ factors  
106 (Pierce *et al.*, 2001; Friesner & Britt, 2003, 2003; Maruyama *et al.*, 2015; Tran *et al.*, 2019),  
107 increase the HDR efficiency up to 19-fold (Tran *et al.*, 2019). XRCC4 is one cofactor of LIG4 to  
108 interact with KU 70 and KU 80 and ligate the DSB (Grawunder *et al.*, 1998b). Ku70 and Ku80  
109 protect DSB from discrediting by forming one heterodimeric complex to bind tightly and load  
110 additional repair proteins such as DNA ligase IV, which is outwardly involved only in NHEJ  
111 (Grawunder *et al.*, 1998a). Programmable endonucleases affect DSBs at target positions in  
112 genomic DNA but can also create undesired breaks outside of on-target positions and create off-  
113 target mutations. Cleavage at off-target sites direct to chromosomal rearrangements, including  
114 translocations, insertions, and deletions, which happen in the interruption of regular gene  
115 expression and the activation of oncogenes (Li *et al.*, 2019). Today, scientists have realized that  
116 reducing off-target may allow efficient and accurate genome editing (Wu & Yin, 2019). For this  
117 why, the effect of off-targets on efficient, precise genome editing and ways to reduce their  
118 impacts has already been studied (Hajiahmadi *et al.*, 2019; Li *et al.*, 2019; Wu & Yin, 2019).

119 In this study, we hypothesized that inhibition of nonhomologous recombination cofactors  
120 XRCC4 promotes the HDR efficiency in poplar trees. We used the optimized length of  
121 homologous arms 400 bp (Song & Stieger, 2017) and could overcome to make one recombinant  
122 chromosomal DNA in *P. trichocarpa* with a haploid chromosome of 19 by inhibiting activities  
123 of the NHEJ pathway (Maruyama *et al.*, 2015) and enhancing the activities of the HDR pathway  
124 (Tran *et al.*, 2019).

125

## 126 **Materials and Methods**

### 127 **Plant Transformation**

128 We cultivated *Populus trichocarpa* seedlings in a phytotron at 23±2°C under a 16/8  
129 light/dark time (Movahedi *et al.*, 2015). To generate transgenic lines, we used stems from four  
130 weeks old young poplars and dipped them in the optimized of *Agrobacterium*  
131 *tumefaciens* stimulant and pathogenic suspension (OD<sub>600</sub>: 2.5, 120 min, pH ~5, Acetosyringone  
132 (As): 200 µM) (Movahedi *et al.*, 2014) for 5 min with gentle shaking and then transferred in  
133 semi-solid woody plant medium (WPM) enriched with 0.05 mg/L Indole-3-butyric acid (IBA),  
134 0.006 mg/L thidiazuron (TDZ), 200 µM As and 0.5% (w/v) agar. Afterward, the stimulated

135 stems were incubated in a dark area at 23°C for two days. The assumed transformants were then  
136 co-cultivated in selection media enriched with 0.1 mg/L IBA, 0.006 mg/L TDZ, 100 mg/L  
137 cefotaxime, 8 mg/L hygromycin, 50 mg/L Zeocin and 0.8% (w/v) agar. Two weeks regenerated  
138 buds were then sub-cultured independently in media including 0.1 mg/L IBA, 0.001 mg/L TDZ,  
139 100 mg/L cefotaxime, 8 mg/L hygromycin, 50 mg/L Zeocin and 0.8% (w/v) agar to grow. After  
140 six weeks, grown buds (Each bud included four to six small leaves) were introduced in MS  
141 media with 0.1 mg/L IBA, 200 mg/L cefotaxime, 8 mg/L hygromycin, 100 mg/L Zeocin, and 0.8%  
142 (w/v) agar to root. Five lines were used for each experiment independently, and each line  
143 included about 30 individuals.

#### 144 **Targets and protein detection**

145 We decided to target the *MKK2* gene from *Populus trichocarpa* (POPTR\_0018s05420g;  
146 Chromosome 18). Therefore, we used Uniprot (<https://www.uniprot.org/>) to download MKK2  
147 protein and then used the BLAST database of the National Center for Biotechnology Information  
148 (NCBI) (<https://blast.ncbi.nlm.nih.gov/>) to download full DNA sequences and CDS. To detect  
149 targets, we used Geneious Prime® 2020.1.1 to analyze *MKK2* locus and to detect targets in  
150 comparison with the whole genome of *P. trichocarpa*, which has been already downloaded from  
151 NCBI (Supplementary Table 1) (Hsu *et al.*, 2013; Doench *et al.*, 2014). Geneious Prime® also  
152 has been used to analyze the *XRCC4* (POPTR\_0010s08650g, Chromosome 10) gene for  
153 knocking out. The PAM motif target sequences were concerned with the exon 8 area from  
154 the *MKK2* and exon 1 area from the *XRCC4* genes. Furthermore, and to evaluate the effect of  
155 HDR proteins and also proper function of edited *MKK2* gene in achieved poplar trees, we used  
156 Uniprot to use CtIP (POPTR\_001G269700v3), MRE11 (POPTR\_0001s41800g), BRCA1  
157 (POPTR\_0005s26150g), Rad50 (POPTR\_0001s32760g), Rad51 (POPTR\_0014s06360g), Lig4  
158 (POPTR\_0018s13870g).

#### 159 ***MKK2* locus target oligo synthesis**

160 For targeting indicated DNA sequences, we designed a pair of oligos (Supplementary  
161 Table 2; *MKK2* Oligo-F and -R) flanked by *BsaI* adaptors. Synthesized oligos were then ligated  
162 into digested pRGE31 vectors by *BsaI* restriction enzyme (Xie & Yang, 2013) to construct  
163 pgRNA (Supplementary 1a). Afterward, we transferred all vectors into *E. coli* (DH5 $\alpha$ ) and  
164 propagated under normal conditions. Vectors were then extracted using the plasmid midi kit  
165 (Qiagen, USA) and confirmed by sanger sequencing (GenScript, Nanjing).

## 166 **Construction of DDT and pDDT**

167 To produce DDT, we designed five fragments, constructed and ligated them, respectively  
168 (Supplementary2a). To construct fragment one, the OsU3 promoter and gRNA scaffold were  
169 isolated from pRGEB31 (Supplementary Table 2, OS1-F and -R) flanked by HindIII and BamHI  
170 endonucleases. To increase the amount of DDT in the cell nucleus and improve HDR efficiency,  
171 we decided to use the cleavage property of Cas9 with designing two unique gRNA targets 1 and  
172 -2 (No on- and -off-targets through whole poplar genome) besides DDT (Zhang *et al.*, 2017)  
173 (Supplementary 1b). Thus, we designed special gRNA oligos (Sgo1-F and -R) (Supplementary  
174 2a; Supplementary Table 2, special gRNA oligo1-F and -R) as the described details (Xie & Yang,  
175 2013) to form special gRNA target1 (Sgt1) and to ligate into the fragment one. To construct  
176 fragment two, we isolated 5' homology arm (400 bp) sequences from *P. trichocarpa* genomic  
177 DNA (Supplementary Table 2, 5' Ho-F-1 and -R-1). Afterward, regular PCR was carried out  
178 using primers with the extensions of BamHI-special target1 (St1) and 39 bp from complemented  
179 5' of fragment 3 (Supplementary Table 2, 5' Ho-F-2 and -R-2) (Supplementary 2a) to achieve  
180 component two.

181 To construct fragment three, we isolated the BleoR CDS from the PCR®-XL-Topo®  
182 vector (Supplementary Table 2, BleoR-1092F and -2276R). Then, the overlap-PCR was  
183 performed (Supplementary Table 2, BP1,2,3-F and -R) using isolated BleoR CDS as the template  
184 to add the remained sequences from exon 8 and exon 9 to the 5' region of BleoR CDS and also  
185 6XHis and PolyA tail to the 3' area of BleoR CDS (Supplementary 2a). To assemble fragment  
186 four, we isolated a 3' homology arm (400 bp) (Supplementary Table 2, 3' Ho-F-1 and -R-1)  
187 from *P. trichocarpa* genomic DNA. Then, we performed PCR to extend 3' homology arm with  
188 30 bp Poly-T and *Nco*I-special target2 (St2) sequences (Supplementary Table 2, Ho-F-2 and -R-2)  
189 (Supplementary 2a). Finally, we performed standard PCR to isolate the OsU3 promoter and  
190 gRNA scaffold again from pRGEB31 (Supplementary Table 2, Os2-F and Os2-R). Moreover,  
191 we designed special gRNA oligos (Sgo2-F and -R) (Supplementary 2a; Supplementary Table 2,  
192 special gRNA oligo2-F and -R) again as the described details (Xie & Yang, 2013) to form  
193 special gRNA target2 (Sgt2) and to ligate into the fragment five.

194 To construct pDDT, we ligated fragments three and two using PCR (Supplementary 2b).  
195 For this, we designed a 39 bp overhang on fragment two that was complementary to the end of  
196 fragment three to form preliminary DDT (Supplementary 2b). In this PCR, we prepared a PCR

197 reaction with 500 ng of each component. We used everything in PCR reaction except primers  
198 and then denatured fragments at 95 degrees for 5 minutes and allowed two annealing and  
199 extension cycles. We allowed PCR products to anneal at 68 degrees to avoid nonspecific  
200 hybridization amongst the long PCR products for 30 seconds and then extend for one minute at  
201 74 degrees to have a double-stranded outcome. Then we added the primers to the distal ends of  
202 fragments two and three and performed one standard PCR. We purified PCR products and  
203 ligated into the pEASY vector to sequence and confirm. Then we ligated the preliminary DDT  
204 product to fragment four as described before and formed secondary DDT products  
205 (Supplementary 2b). After sequencing and confirmation, we used the restriction cloning  
206 technique to ligate secondary DDT product to the fragments one and four (Supplementary 2b) to  
207 achieve DDT products. Briefly, we incubated a reaction including 50 ng of each digested  
208 fragments, 10x T4 DNA ligase buffer 0.5 ul, T4 DNA ligase (NEB) 1 ul, and H<sub>2</sub>O to 5 ul at 25  
209 degrees for 4 hours and transferred into *E. Coli* DH5a competent cells for sequencing and  
210 confirmation. Subsequently, we used the restriction cloning technique to merge the DDT product  
211 and pRGEB31 vector and form the pDDT vector (Supplementary 2b).

## 212 **Synthesis of pgCtIP and pgMR**

213 To design a fused CtIP and Cas9 cassette, we isolated the CaMV35S promoter, 3xFLAG,  
214 and Cas9 CDS from pRGEB31 (Supplementary 3a) using designed primers (Supplementary  
215 Table 2). In the next step, we obtained CtIP CDS using RT-PCR from the *Populus trichocarpa*  
216 genome (Supplementary 3a; Supplementary Table 2, CtIP-F and -R). The 3'UTR and PolyA  
217 fragments were isolated from the pCAG-T3-hCAS-pA plasmid (Supplementary 3a;  
218 Supplementary Table 2, PolyA-F and -R). To complete pgCtIP, we ligated CaMV35S and  
219 3xFLAG fragments using restriction cloning and formed backbone 1 (Supplementary 4a). The  
220 isolated Cas9 and the obtained CtIP CDS were also ligated, applying restriction cloning to form  
221 the backbone 2 (Supplementary 4a). The backbones 1 and 2 were then ligated using *Hind*III  
222 restriction cloning to form backbone 3 (Supplementary 4a). In the next step, the resulted  
223 backbone 3 was ligated to the assembled 3'UTR-PolyA using *Stu*I restriction cloning to form the  
224 CtIP cassette (Supplementary 4a; Supplementary 5a). We used *Sda*I and *Pme*I restriction  
225 enzymes to restrict the cloning of the CtIP cassette and pRGEB31 and achieve the pgCtIP  
226 plasmid (Supplementary 4a; Supplementary 5a).

227 To construct a fusion of MRE11 and Cas9, we isolated CaMV35 promoter, 3xFLAG,  
228 Cas9, 3'UTR, and PolyA as same the previous steps (Supplementary 3b; Supplementary Table 2).  
229 The MRE11 CDS was obtained recruiting extracted total RNA from *Populus trichocarpa*  
230 genome and RT-PCR as mentioned above (Supplementary 3b; Supplementary Table 2, MRE-F  
231 and R). To complete pgMR, we ligated the isolated CaMV35S and 3xFLAG fragments  
232 concerning *XhoI* endonuclease to form backbone 1 (Supplementary 4b). On the other hand, we  
233 constructed backbone 2 using the isolated Cas9 and 3'UTR-PolyA fragments (Supplementary 4b).  
234 The backbone 1, backbone 2, and MRE11 CDS product were then merged concerning *NotI*  
235 and *NdeI* restriction cloning to form MR cassette (Supplementary 4b; Supplementary 5b).  
236 Afterward, we used restriction cloning with *SdaI* and *PmeI* to construct pgMR plasmid  
237 (Supplementary 4b; Supplementary 5b).

### 238 **Synthesis of pgCtMR and pggCtMR**

239 To construct the CtMR cassette, we prepared all the required fragments, as mentioned  
240 above (Supplementary 3c). Afterward, we merged the CaMV35S and 3xFLAG components  
241 using *XhoI* restriction cloning to form backbone 1 (Supplementary 6a). We then ligated  
242 backbone 1 and the already obtained MRE11 CDS product (Supplementary Table 2, MRE-F and  
243 -R) using *NotI* restriction cloning to form backbone 2 (Supplementary 6a). On the other hand, the  
244 isolated Cas9 and the obtained RT-PCR product CtIP CDS were ligated using *BamHI* restriction  
245 cloning to form backbone 3 (Supplementary 6a). We then used backbone 3 and isolated 3'UTR-  
246 PolyA fragment to form backbone 4 (Supplementary 6a). Eventually, we cloned backbones 2 and  
247 4 to construct the CtMR cassette (Supplementary 6a; Supplementary 5c) and thereupon  
248 implemented *SdaI* and *PmeI* restriction cloning to ligate CtMR cassettes into pRGEB31, forming  
249 pgCtMR plasmid (Supplementary 6a; Supplementary 5c). To target the *XRCC4* gene  
250 and *MKK2* simultaneously, we designed one cassette, including both *XRCC4*, by adding one  
251 CRISPR site (Located on 5' region of target CDS) to mutate *XRCC4* (Non-off-target site on  
252 whole poplar genome; Activity score: 0.415; Specificity score: 100%) (Hsu *et al.*, 2013; Doench  
253 *et al.*, 2014), and *MKK2* gRNAs. For this purpose, we used primers (Supplementary Table 2,  
254 XR-Cass1-F and -R) to isolate the OsU3 promoter and gRNA scaffold from the pRGEB31 vector  
255 and then used *MKK2* designed oligos (Supplementary Table 2, *MKK2* Oligo-F and -R) to  
256 ligate *MKK2* target duplex (Supplementary 3d). Besides, we used primers (Supplementary Table  
257 2; XR-Cass2-F and -R) to isolate the OsU3 promoter and gRNA scaffold again. In this process,



258 we applied *XRCC4* designed oligos (Supplementary Table 2; XRCC4-Oligo1 and -2) to  
259 ligate *XRCC4* target duplex (Supplementary 3d). The achieved fragments were then cloned  
260 using *KasI* restriction cloning to form *XRCC4*-Cassette (Backbone 1) (Supplementary 6b;  
261 Supplementary 5d). Afterward, the *XRCC4*-Cassette was cloned into pRGEB31 using *HindIII*  
262 and *SdaI* restriction cloning to form backbone 2 (Supplementary 6b). Finally, we used *SdaI*  
263 and *PmeI* restriction cloning to clone the CtMR cassette into the backbone 2 forming pggCtMR  
264 plasmid (Supplementary 6b; Supplementary 5d). We performed PCR, cloning into pEASY T3  
265 vector, and DNA sequencing in all the above processes for confirming the right ligation.

### 266 **RT-PCR, DNA sequencing, Southern blotting, and Western blotting**

267 Total RNA (100 ng/ml) was extracted from young leaves of five weeks grown buds on  
268 Zeocin applying TRIzol. We then carried out reverse transcription using total RNA and oligo-dT  
269 primers to synthesize the first cDNA strand (PrimeScript One-Step RT-PCR Kit Ver.2, Takara  
270 Biotechnology, Dalian, China) according to the manufacturer's instructions. Afterward, we  
271 designed two RT-PCR for both investigations of right *MKK2* transcription and right happening  
272 HDR. The first RT-PCR was intended to isolate a 920 bp of *MKK2* CDS (Supplementary Table  
273 2, RT-F and R) while the forward primer was designed from 5' region of exon 9 (15 bp) and 3'  
274 region of exon 8 (15 bp). This RT-PCR purpose was to show the precise attaching of exon 8 and  
275 9 to direct the transcription of *MKK2* correctly. The second RT-PCR was performed to isolate a  
276 413 bp of recombinant CDS (Supplementary Table 2, RT-F-107 and RT-R-519). The forward  
277 primer was designed from *BleoR*, and the reverse primer was designed from exon 7 of *MKK2*.  
278 The purpose of this RT-PCR was to show the explicit HDR happening through our experiments  
279 via transcription of single mRNA from *MKK2* and *BleoR*.

280 Genomic DNA was extracted from young leaves of five weeks grown buds on Zeocin,  
281 applying the DNeasy Plant Mini Kit (Qiagen, USA). The quality of the extracted genomic DNA  
282 (250–350 ng/μl) was determined by a BioDrop spectrophotometer (UK). To DNA sequencing,  
283 we carried out PCR using designed primers (Supplementary Table 2, *MKK2*-S-7F and *MKK2*-S-  
284 1139R), Easy Taq polymerase (TransGene Biotech), and 50 ng of extracted genomic DNA as a  
285 template. All desired bands were then cut off from gels, purified, and sent to the company for  
286 sequencing (GeneScript, Nanjing), alignment, and analysis (Supplementary 7-11). Southern  
287 blotting was performed to verify the integration of *BleoR* into the poplar genome. 500 ng of  
288 genomic DNA was cleaved with *BamHI* and *HindIII* at 37 °C for 4 h. The digested DNA was

289 then used as a template for PCR to label a 160 bp probe from integrated *BleoR* CDS into the  
290 genomic DNA (Supplementary Table 2; S-F and -R). In this step, we used the DIG (digoxigenin)  
291 reagent, according to the manufacturer's instruction (catalog number 11745832910; Roche,  
292 Basel, Switzerland). PCR product was then segregated on a 0.8% agarose gel. The separated  
293 fragments were shifted on a Hybond N+ nylon membrane (Amersham Biosciences BV,  
294 Eindhoven, The Netherlands).

295 For extraction of proteins, 150 mg fresh leaves of five weeks grown buds were milled in  
296 500  $\mu$ l extraction buffer (125 mM Tris, pH 6.8, 4 M Urea, 5%  $\beta$ -mercaptoethanol, 4% w/v SDS).  
297 The centrifuge was then performed at 13,000 rpm for 10 min, and the supernatant was obtained  
298 for gel analysis. The extracted protein was then boiled in loading buffer (24% w/v glycerol, 100  
299 mM Tris, a drop amount of Bromophenol Blue, 4% v/v  $\beta$ -mercaptoethanol, 8% w/v SDS) for 10  
300 min. The extracted protein was analyzed by SDS-PAGE and conceived using coomassie brilliant  
301 blue R-250 staining. After that, we carried out western blotting according to Sambrook *et al.*  
302 (1989) using a rabbit anti-His polyclonal antibody developed in our laboratory as the primary  
303 and peroxidase-conjugated goat antirabbit IgG (Zhongshan Biotechnology, Beijing, China) as the  
304 secondary antibody.

### 305 **TaqMan real-time PCR**

306 To test the effect of designed parameters in all experiments on the proper integration of  
307 exogenous *BleoR* with both homology arms, we decided to run the TaqMan assay applying dye  
308 labels such as FAM and VIC adopting Applied Biosystem real-time PCR (Applied Biosystems,  
309 USA). We used high quality extracted genomic DNA (Refer to the southern blotting) as the  
310 template for running TaqMan real-time PCR. In this assay, two fluorescent FAM and VIC will  
311 attach to the 5' region of the probe, while a non-fluorescent quencher (NFQ) binds to the 3'  
312 region. Thus, we designed primers to probe two 150 bp fragments FAM1 (Supplementary 2,  
313 FAM1-F and -R) and FAM2 (Supplementary 2, FAM2-F and -R). These primers were designed  
314 in such a way that FAM1 was able to probe 114 bp nucleotides from the 5' homology arm and  
315 also 36 bp from *BleoR*. Besides, FAM2 was able to probe 105 bp nucleotides from the 3'  
316 homology arm and 45 bp from the *BleoR* (Supplementary 12). We also designed primers  
317 (Supplementary 2, VIC-F, and -R) to probe one 106 bp fragment VIC on the *actin* gene as the  
318 reference with stable copy number (Supplementary 12). All samples were analyzed in  
319 quadruplicate.

## 320 **Evaluation of HDR efficiency**

321 To evaluate the HDR efficiency, we decided to calculate and compare the  $\Delta\Delta C_t$  mean of  
322 *BleoR* expression integrated into the poplar genome from all grown buds in five designed  
323 experiments separately. In this step, we used the synthesized cDNA (Point to the RT-PCR  
324 section) and designed primers (Supplementary Table 2, *BleoR*-52F and -151R) to carry out real-  
325 time PCR. We used the Fast Start Universal SYBR Green Master (Rox; No. 04913914001:  
326 Roche, USA) and performed three technical repeats for each event. Then, we used ANOVA-One  
327 way to analyze the achieved mean data and compared.

## 328 **RT-qPCR**

329 We applied RT-qPCR using synthesized cDNA from grown buds on Zeocin (as  
330 mentioned above) as the template and designed primers (Supplementary Table2, RT-qPCR part)  
331 to investigate the expression of *BleoR* and *MKK2* genes and their impact on each other. We also  
332 explored our method's impact to develop HDR efficiency on HDR (CtIP, MRE11, BRCA1,  
333 Rad50, and Rad51) and NHEJ (Lig4, XRCC4) influential factors.

## 334 **Statistical analysis**

335 All data were analyzed using ANOVA One-Way with Turkey means comparison  
336 calculated by OriginPro 2018 and Excel 2019 software (Microsoft, Redmond, WA, USA).  
337 Differences were analyzed statistically when the confidence intervals presented no overlap of the  
338 mean values with an error value of 0.05.

## 339 **Results**

### 340 **HDR strategy and target detection**

341 Our purpose in this study was to increase HDR efficiency to integrate one exogenous into  
342 the poplar genome. For this purpose, we decided to integrate *BleoR* exogenous with *the*  
343 *MKK2* gene (Figure 1a) to generate resistant poplar against the Zeocin antibiotic. We started to  
344 recognize CRISPR sites located on the *MKK2* gene near the 3' UTR and scored all detected  
345 targets (Hsu *et al.*, 2013; Doench *et al.*, 2014) concerning higher scores denoting higher activity  
346 specificity and less off-target activity. We discovered one target located on exon 8 with the  
347 highest activity score and no detected off-target on CDS throughout the whole *Populus*  
348 *trichocarpa* genome (Figure 1a and Supplementary Table 1). According to Figure 1b, the  
349 strategy of integrating *BleoR* was to target exon 8 in *MKK2*. Protospacer Adjacent Motif (PAM),  
350 including two nucleotides from exon 8 and one nucleotide from intron 8, was detected close to

351 the end of exon 8 to lead Cas9. 400 bp from upstream sequences of the desired target, including a  
352 few sequences from intron 6, exon 7, intron 7, and a few sequences from exon 8), was selected to  
353 be 5' homology arm (Figure 1b). Regarding the desired CRISPR target and to avoid *MKK2*  
354 damaging, we decided to add particular sequences instead of remained nucleotides from exon 8  
355 (Leu-Ala-Thr-Leu-Lys-Thr-Cys) and also particular sequences instead of exon 9 (Val-Leu-Val-  
356 Lys-Met) to the end of 5' homology arm (Supplementary 1b). Then, 375 bp *BleoR* CDS, 18 bp  
357 6xHis tag, and 30 bp Poly A were designed to attach the achieved DDT sequences, and finally,  
358 400 bp from downstream sequences of the desired target was selected to be 3' homology in the  
359 designed DDT.

### 360 **Transformant poplars with no integrated *BleoR* revealed no recovery on selection media**

361 To investigate whether *XRCC4* deficiency enables to improve the HDR efficiency at the  
362 desired locus, we first tested the integration of DDT without both *XRCC4* deficiency and fusing  
363 CtIP and MRE11. Therefore, to transform pgRNA and pDDT into plant cells, we utilized the  
364 optimized of *Agrobacterium tumefaciens* strain EHA105 stimulant and pathogenic  
365 suspension  $OD_{600} = 2.5$  ( $\sim 2 \times 10^9$  cell ml<sup>-1</sup>) with the ratio of 4:1 pDDT/pgRNA to increase DDT  
366 fragments during S/G2 cell division (Tran *et al.*, 2019) and to avoid off-target editing caused by  
367 the extra accumulation of pgRNA (Hajiahmadi *et al.*, 2019) (Figure 2a).

368 For transformation, cut stems were carried on regeneration media (Figure 2b-a).  
369 Regenerated calli were then transported on selection media, including Zeocin, to elongate.  
370 Grown buds (Figure 2b-b) were then selected to convey on rooting media (Recovering) to sieve  
371 recovered events (Figure 2b-c).

372 We planned five different HDR experiments (Figure 2c). In the designed Experiment I  
373 (EXI), we tried to improve HDR efficiency by transferring only DDT into the plant cells (Figure  
374 2c; Supplementary 1b). In this experiment, 34 individuals were regenerated on selection media  
375 (Including Zeocin). We then allowed them to grow and elongate. Only nine buds were grown on  
376 selection media. Grown buds were later transferred on rooting media to sieve recovered edited  
377 events. It was not observed any recovered in EXI (Figure 2c). We decided to design a plasmid  
378 that included a fused CtIP (Tran *et al.*, 2019) and Cas9 (pgCtIP) instead of pgRNA with a ratio  
379 of 4:1 pDDT/pgCtIP to promote HDR efficiency in poplars via Experiment II (ExII) (Figure 2c;  
380 Supplementary 5a). Only seventeen events were observed to be grown from a total of 42  
381 regenerated buds. Also, only one recovered event was discerned after transferring on rooting

382 media. In continuous and to investigate the effect of MRE11 (Tran *et al.*, 2019) to improve HDR  
383 efficiency in poplars, we designed plasmid harboring a combined MRE11 and Cas9 (pgMR)  
384 instead of pgRNA with the same ratio of 4:1 pDDT/pgMR via Experiment III (ExIII) (Figure 2c;  
385 Supplementary 5b). In this experiment, we observed fifteen grown buds and only one recovered  
386 edited event. Because our experiments did not show significant recovered events in overcoming  
387 NHEJ to integrate *BleoR*, we determined to design Experiment IV (ExIV), and one plasmid  
388 harboring fused both MRE11 and CtIP with Cas9 (pgCtMR) (Figure 2c; Supplementary 5c).  
389 Recovered events were increased insignificantly to four. Therefore, we decided to  
390 target *XRCC4* as one key factor in the NHEJ pathway (Maruyama *et al.*, 2015) besides CtIP and  
391 MRE11 overexpressing. For this purpose, we designed Experiment V (ExV) and one plasmid  
392 harboring *XRCC4* gRNA and also fused both MRE11 and CtIP with Cas9 (pggCtMR) (Figure 2c;  
393 Supplementary 5d). We tried to transfer this plasmid into the plant cells with the same ratio of  
394 4:1 pDDT/pggCtMR. In this experiment, recovered events were shown increased surprisingly to  
395 twelve events from thirty-one grown buds on selection media.

#### 396 **Confirmation of transformants by western blotting, RT-PCR, and Southern blotting**

397 Western blotting has been carried out to confirm the exact transformation to conjugate  
398 the BleoR and MKK2 proteins. Using Western blotting, we also find out which grown buds on  
399 Zeocin have been genetically edited by integrating the BleoR. We fused 6xHis tag sequences in  
400 the C-terminal position of BleoR (Supplementary 1b). Regarding our results, we could not  
401 recognize any successful editions in events from ExI. Through screening of ExII events, one  
402 bond (event II#29) was observed about 54 KDa (Figure 3a), which led us to hypothesize the  
403 successful integration of BleoR (125 amino acids and ~13.7 KDa) into the MKK2 (365 amino  
404 acids and ~40.5 KDa) (Figure 3b). Within screening results of events from ExIII, we observed  
405 only one bond (III#6) about 14 KDa (Figure 3a). In this issue, we hypothesized that only BleoR  
406 could be expressed, and MKK2 may be knocked out by sudden Insertions and Deletions (InDels)  
407 throughout exon 7, 8, or 9 (Figure 3b). The results from ExIV showed an insufficient increase in  
408 a complete edition with three bonds (Events IV#17, #54, and #68) about 54 KDa and one bond  
409 (Event IV#92) about 14 KDa (Figure 3a). After that, we screened the results of ExV, and  
410 surprisingly, it was observed sufficient increase in successful editions with ten bonds (Events  
411 V#21, #25, #29, #32, #39, #59, #73, #88, #91, and #94) about 54 KDa and two bonds (Events  
412 V#37, and #53) about 14 kDa (Figure 3a).

413 To confirm western blotting issues and the expression of integrated *BleoR* and edited  
414 *MKK2* in transformant poplars, we designed two RT-PCR assays (Figure 3c and d). Regarding  
415 the results, we did not observe any desired bond from ExI events. Then, we considered ExII and  
416 Ex III events respectively and found out 3 (events #24, #29, and #35) and 4 (events #10, #23,  
417 #36, and #45) 920 bp bonds (Figure 3e). Next, we considered the ExIV events and observed 9  
418 (events #9, #17, #39, #45, #54, #60, #68, #72, and #83) increased desired bonds compared with  
419 events included in ExII and ExIII. We then considered RT-PCR resulted from ExV and  
420 surprisingly discovered 20 desired bonds. The second RT-PCR was also carried out, and results  
421 revealed that we could not achieve the desired 413 bp bond (Figure 3f). ExII events revealed  
422 only one 413 bp amplification (event #29), but ExIII revealed no desired bond (Figure 3f). We  
423 then considered ExIV and observed 3 (events #17, #54, and #68) 413 bp bonds, while ExV  
424 events revealed significantly increased 10 (events #21, #25, #29, #32, #39, #59, #73, #88, #91,  
425 and #94) bonds.

426 We decided to carry out southern blotting to confirm the achieved results by western  
427 blotting and RT-PCR assays. We selected all events that showed bonds in western blotting and  
428 designed probes that could bind with only exogenous *BleoR* sequences (Figure 3g). Regarding  
429 southern blotting (Figure 3h), all issued results from western blotting were confirmed by  
430 southern blotting. Several events (III#6, IV#90, V#37, and V#53), which have been resulted in  
431 southern blotting, were not amplified through the second RT-PCR.

#### 432 **Accurate investigation of edited events and HDR efficiency**

433 We then used TaqMan real-time PCR to detect HDR probabilities more accurately and  
434 investigate *XRCC4* deficiency. It was necessary to have two probes FAM1 including exon 8 and  
435 exon 9 from *MKK2* (114bp) attached by 36 bp from 5' *BleoR* CDS and FAM2 including 57 bp  
436 from 3' homology arm, 48 bp from attached poly-A and 6xHis, and 45 bp from 3' *BleoR* CDS  
437 (Figure 4a). In this strategy, the events that revealed fluorescent signals of FAM1 or FAM2 were  
438 assumed to be partially edited (Figure 4b). On the other hand, the events that revealed  
439 fluorescent signals of FAM1&2 were supposed to be successfully edited (Figure 4b). The events  
440 with no fluorescent signals of FAM1 and FAM2 were considered to be mutant or outlasted Wild-  
441 type (WT) (Figure 4b).

442 We analyzed all signals and used two-dimensional kernel density plots (Figure 4 c-g) and  
443 also one-dimensional Box and whisker (Supplementary 13a-d) to illustrate them. The analyzing

444 data from ExI events exhibited no edited event, while we got all signals as the partial FAM1 or  
445 partial FAM2 and much more signals as the mutant or WT poplars (Figure 4c). In ExI, the  
446 averages of fluorescent signals of FAM1  $\Delta\Delta\text{Ct}$  and FAM2  $\Delta\Delta\text{Ct}$  were shown proximal to 0  
447 (Supplementary 13a). Therefore, we performed Sanger sequencing to confirm these results, and  
448 our analysis interpreted that we had not been able to achieve an edited event through ExI  
449 (Supplementary 7).

450 We then considered events involved in ExII and -III and noticed an increase in the signal  
451 densities of the FAM1 and FAM2 compared with ExI (Figure 4d, and e). The analysis of  
452 fluorescent signals proved the increase in the average of FAM1  $\Delta\Delta\text{Ct}$  and FAM2  $\Delta\Delta\text{Ct}$  about  
453 14.5 and 13.5 from ExII events, while it was determined more FAM1  $\Delta\Delta\text{Ct}$  about 16 and a lesser  
454 FAM2  $\Delta\Delta\text{Ct}$  about 10 from ExIII events (Supplementary 13b, and c). The alignment of Sanger  
455 sequencing proved our findings confidently. In ExII, we found four edited events (II#7, II#19,  
456 II#53, and II#59), four partial FAM1 events (II#13, II#21, II#35, and II#41), and four partial  
457 FAM2 events (II#3, II#11, II#14, and II#23) (Supplementary 8; Supplementary 14a). In ExIII,  
458 we found three edited events (III#21, III#45, and III#61), five partial FAM1 events (III#10,  
459 III#23, III#27, III#32, and III#53), three partial FAM2 events (III#6, III#17, and III#36)  
460 (Supplementary 9; Supplementary 14b). Regarding the analysis, the signal density of edited  
461 events from ExIV was increased, while the signal densities of Partial FAM1, partial FAM2, and  
462 WT or mutant events were significantly decreased (Figure 4f). The mean fluorescent signals of  
463 FAM1  $\Delta\Delta\text{Ct}$  and FAM2  $\Delta\Delta\text{Ct}$  from ExIV events also were observed with an increase of about  
464 19 and 15, respectively (Supplementary 13d). We found nine edited events (IV#9, IV#27, IV#39,  
465 IV#45, IV#54, IV#68, IV#79, IV#83, and IV#90), seven partial FAM1 events (IV#13, IV#17,  
466 IV#19, IV#46, IV#60, IV#75, and IV#85), four partial FAM2 events (IV#13, IV#76, IV#80, and  
467 IV#92)(Supplementary 10; Supplementary 14c). Finally, the signal density of ExV edited events  
468 was meaningfully increased, while the partial, WT, and mutant signal densities were surprisingly  
469 reduced (Figure 4g). Moreover, the mean of fluorescent signals of FAM1  $\Delta\Delta\text{Ct}$  and FAM2  $\Delta\Delta\text{Ct}$   
470 was increased about 21.5 and 18, respectively (Supplementary 13e). Therefore, we consider to  
471 analyze the related alignment and discovered 15 edited events (V#3, V#9, V#21, V#25, V#29,  
472 V#33, V#39, V#67, V#73, V#79, V#88, V#91, V#92, V#94, and V#101) (Supplementary 11;  
473 Supplementary 14d; Supplementary 17). We then decided to analyze the total achieved FAM  
474 fluorescent signals to show *XRCC4* deficiency affecting enhancing HDR based on the promising

475 results. We analyzed all FAM signals (FAM1, FAM2, and FAM1&2) achieved among real-time  
476 PCR and compared them through each experiment (Figure 4h). Our interpretation showed more  
477 FAM signals remarkably measured in ExV than ExI, II, and-III. According to the analysis, we  
478 detected the highest FAM signals from ExV events significantly more than ExI,-II, -III events  
479 (Figure 4h). Moreover, CtIP and MRE11 (ExIV) overexpression simultaneously increased these  
480 signals and promoted HDR not as big as ExV events (Figure 4h). We also observed that the only  
481 CtIP (ExII) or MRE11 (ExIII) were not able to improve HDR occurring significantly (Figure 4h).

482 The expression of exogenous *BleoR* integrated into the poplar genome was used as the  
483 authority of HDR efficiency. We performed real-time PCR to evaluate the percentage of delta-  
484 delta Ct mean (Supplementary 15a) and then analyzed the mean achieved to compare and  
485 illustrate the bar plot supported by standard distribution curves (Figure 4i; Supplementary 15b).  
486 Our analysis revealed the *BleoR* expression a mean of -1.2287 from ExI events. This mean was  
487 increased through EXII and EXIII events with 4.40787 and 6.11543. We then considered that  
488 mean within EXIV events and discovered one increase of 19.06057. Finally, despite all our  
489 previous observations, we found one significant development in *BleoR* expression integrated into  
490 the poplar genome throughout EXV events of 48.90032. Our analysis proved this increase of  
491 HDR efficiency significantly more than EXIV, EXIII, EXII, and EXI (Figure 4i).

#### 492 **The effect of efficient HDR on the expression of NHEJ and HDR factors**

493 Regarding the new edition of the poplar genome in our study by integrating  
494 exogenous *BleoR* fused with *MKK2*, we decided to investigate these two genes' expression and  
495 their interdependence. The complete and exact expression of each of these genes indicates the  
496 efficiency of HDR. It could also show the conventional functioning of these genes in the new  
497 version of the poplar genome. So, we analyzed the achieved data of RT-qPCR from all events  
498 and used Violon plots to describe their distributed expressions (Figure 5) and Column plots to  
499 show all the gene expressions from each event separately (Supplementary 16). While our  
500 analysis revealed distributed expressions of *MKK2* and *BleoR* about +1 and -1 among ExI events,  
501 they were shown between about 100 and zero with medians about zero (Figure 5a and b). Within  
502 the ExII, we got three *MKK2* expressions (Events #21, #29, and #35) and only  
503 one *BleoR* expression (Event #29) (Supplementary 16). We then analyzed these gene expressions  
504 from ExIII and discovered promoted distributed expression of *MKK2* (Figure 5c). In this  
505 experiment, we found four *MKK2* expressions (Events #10, #23, #36, and #45) with



506 one *BleoR* expression (Event #6) (Supplementary 16). RT-qPCR results for ExV events revealed  
507 enhanced distributions of *BleoR* and *MKK2* expressions (Figure 5d). In this experiment, we  
508 achieved nine *MKK2* expressions (Events #9, #17, #39, #45, #54, #60, #68, #79, and #83) and  
509 four *BleoR* expressions (Events #17, #54, #68, and #90) (Supplementary 16). Regarding the  
510 expressions of these genes from ExV events, we observed significant promotions  
511 in *MKK2* and *BleoR* distributed expressions with a median of about 100 (Figure 5e). Also, the  
512 column bar analysis confirmed these distributions with twenty *MKK2* expressions (Events #3, #9,  
513 #18, #21, #25, #29, #32, #33, #39, #59, #67, #73, #79, #82, #86, #88, #91, #92, #94, and #101)  
514 and twelve *BleoR* expressions (Events #21, #25, #29, #32, #37, #39, #53, #59, #73, #88, #91,  
515 and #94) (Supplementary 16).

516 Moreover, we decided to assess gene expressions involved in HDR and NHEJ pathways  
517 affected by our methods for increasing HDR efficiency. We used a Heat-map plot to interpret the  
518 obtained data from RT-qPCR (Figure 5f).  
519 While *CtIP* (~116), *MRE11* (~115), *BRCA1* (~114), *Rad50* (~113), and *Rad51* (~116)  
520 expressions were increased via ExI compared to WT, it was much more in *Lig4* (~146)  
521 and *XRCC4* (~143) (Figure 5f). The expression of *CtIP* was increased impressively (~166) via  
522 ExII compared with WT, while the expression of *MRE11* (~129), *BRCA1* (~119), *Rad50* (~120),  
523 and *Rad51* (~121) were increased shortly. Through ExII, the expression of *Lig4* (~104)  
524 and *XRCC4* (~105) were decreased compared to ExI (Figure 5f). Within ExIII, the expression  
525 of *MRE11* was increased impressively (~162), but the expression  
526 of *CtIP* (~134), *BRCA1* (~120), *Rad50* (~122), and *Rad51* (~119) were increased a little. Within  
527 this experiment, the expression of *Lig4* (~107) and *XRCC4* (~103) were decreased contrasted  
528 with ExI (Figure 4f). All HDR factors revealed enhanced expressions among ExIV  
529 as *CtIP* (~165), *MRE11* (~164), *BRCA1* (~130), *Rad50* (~128), and *Rad51* (~129),  
530 but *Lig4* (~101) and *XRCC4* (~99) revealed more decreased compared with ExI (Figure  
531 5f). *XRCC4* deficiency in ExV and enhancing *CtIP* and *MRE11* expressions caused amplifying  
532 the expression of *CtIP* (~170) and *MRE11* (~165) much more than WT events. Also, the  
533 expression of *Lig4* (~87) revealed more decreased than WT, and *XRCC4* was knocked out.  
534 Through ExV, the other HDR factors also revealed more expression  
535 as *BRCA1* (~145), *Rad50* (~139), and *Rad51* (~142) (Figure 5f).

## 536 **XRCC4 deficient dramatically enhanced HDR efficiency and decreased polymorphisms**

537 To test whether the promotion of HDR efficiency affects the happened polymorphisms, we  
538 analyzed the polymorphism types, variants genotypes, protein effects, and nucleotide genotyping  
539 of homology arms and also integrated *BleoR* into recovered events. We firstly analyzed the  
540 homology arms for polymorphisms happened by HDR improvement experiments. Seven  
541 polymorphism varieties including deletions, deletion tandem repeats, insertions, insertion tandem  
542 repeats, SNP transitions with A to C or G to T and reversely, SNP transversions with Purines to  
543 pyrimidines or reversely, and substitutions were detected through these editions (Supplementary  
544 Table 3). We then analyzed all detected variant nucleotides together and found out that HDR  
545 happening through ExI events induced the highest polymorphisms significantly more than ExIV  
546 and -V events (Figure 6a). We also observed more happened polymorphisms through ExII and -  
547 III than ExIV and -V. Furthermore, happened polymorphisms through ExIV events were  
548 observed more than ExV events (Figure 6a).

549 We then decided to investigate all polymorphisms in more detail on the homology arms and  
550 the *BleoR* integrated into the recovered poplar genome (Supplementary Table 4). We detected  
551 the highest frequency of deletion nucleotides through ExI events and the least within ExV events  
552 (Figure 6b). We also observed that *XRCC4* deficiency revealed no SNP happening and the least  
553 of SNP transition. The overexpression of *CtIP* decremented deletion tandem repeats (ExII), and  
554 the overexpression of *MRE11* decremented SNPs, SNP transitions, and SNP transversions  
555 (Figure 6b). The overexpression of *CtIP* and *MRE11* simultaneously (ExIV) decremented  
556 substitution polymorphisms (Figure 6b).

557 Moreover, the whisker plot of total polymorphisms presented the maximum distribution of  
558 polymorphisms through ExI events and the minimum of those in ExV events (Figure 6b).

## 559 **Discussion**

560 Despite extensive research on the use of HDR factors to increase HDR efficiency in  
561 plants, no research has been reported using this system in haploid species such as poplar. We  
562 hypothesized that if we increase the HDR pathway efficiency and decrease the NHEJ pathway  
563 efficiency simultaneously, we might overcome it. To achieve this purpose, we must first increase  
564 DDR amount in the cell nucleus correctly and at the right concentration. Therefore, we tried to  
565 achieve this goal by increasing *Agrobacterium* concentration and increasing the plasmid ratio  
566 containing DDT (pDDT) to plasmid containing gRNA (pgRNA) (Figure 2a). Based on the

567 preliminary results obtained from transformation and grown buds on media containing Zeocin,  
568 we hypothesized that the grown buds were all transformed. Therefore, we investigated the grown  
569 buds and transferred them to the rooting medium, including Zeocin and Cefotaxime, for recovery.  
570 Many of the grown buds could not be recovered and died.

571 The western blotting was applied to verify the integration of the 6xHis tag fused with  
572 exogenous *BleoR*. The observations proved the successful combination of *BleoR* through edited  
573 events. All events that exposed 54.2 KDa were supposed to be successfully edited, and all events  
574 that revealed 13.7 KDa were assumed might be unsuccessfully edited. For more details, we used  
575 RT-PCR to investigate the precise integration of *BleoR*, followed by *MKK2*. Regarding our  
576 designed primers, the bands achieved from the first RT-PCR exhibited the  
577 successfully *MKK2* edited events (Figure 3e) and the bands from the second RT-PCR exhibited  
578 the successfully *MKK2+BleoR* edited events (Figure 3f). The comparison of these RT-PCR  
579 assays uncovered the WT or unsuccessfully edited (Only edited *MKK2*) events.

580 For more confirmation, we used primers to probe *BleoR* applying southern blotting. We  
581 discovered which events were edited successfully by our designed DDT regarding obtained  
582 issues from western blotting, RT-PCR, and southern blotting. Because only edited events  
583 integrated by *BleoR* or *MKK2+BleoR* could be recovered, therefore we figured out why some of  
584 the grown buds on Zeocin were drowned and not recovered after transferring to rooting media.  
585 For more investigation, we applied TaqMan real-time PCR for detecting designed FAM1 and  
586 FAM2 signals (Figure 4b-g). Using this method, we compared the occurred HDR through all  
587 grown buds involved in designed experiments by calculating the gained total FAM signals  
588 (Figure 4h). The highest total FAM from ExV events proved that *XRCC4* deficiency caused  
589 HDR development significantly more than overexpression of HDR factors. Moreover, the  
590 investigation of HDR efficiency confirmed that the NHEJ pathway deficient is meaningfully  
591 more efficient to HDR development compared to focus on only overexpression of HDR factors  
592 (Figure 4i).

593 RT-qPCR and compared the *BleoR* and *MKK2* expressions through all grown bud  
594 transcriptomes helped us discover more deeply and accurately the role of decreasing activities of  
595 the NHEJ and increasing activities of the HDR pathways in poplars.

596 The significant difference in the distribution of *BleoR* and *MKK2* gene expressions within  
597 ExI to -IV events confirmed that the overexpression of factors involved in the HDR pathway

598 alone could not have sufficient and appropriate ability to create homologous recombination in  
599 the target genome. In contrast, the similar distribution of *BleoR* and *MKK2* expressions through  
600 ExV events proved that by reducing the NHEJ and improving the HDR pathway, we could  
601 achieve appropriate and desired homologous recombination (Figure 5e).

602 We resulted in further *Lig4* and *XRCC4* expressions than the factors involved in the HDR  
603 pathway (Figure 5f, ExI). Increase the *CtIP* expression within ExII and the *MRE11* expression  
604 within ExIII events caused to decrease the activities of *XRCC4* and *Lig4*, but could not able to  
605 significantly improve the other HDR factor activities and also to improve the development of  
606 desired distributed expressions of *BleoR* and *MKK2* (Figure 5b, c, and f, 5xII and III). The  
607 simultaneously *CtIP* and *MRE11* expressions caused to amplify the other HDR factor activities  
608 and also to decrease the activities of *XRCC4* and *Lig4*, but could not improve the development of  
609 desired distributed expressions of *BleoR* and *MKK2* (Figure 5d, and f; ExIV).  
610 The *XRCC4* deficiency caused not only to amplify the *CtIP* and *MRE11* expressions  
611 meaningfully but also caused a much more increase of the other HDR factor activities and a  
612 much more decrease of *Lig4* expression (Figure 5f, ExV). Furthermore, the *XRCC4* deficiency  
613 developed homologous recombinant and then desired distributed expressions  
614 of *BleoR* and *MKK2* (Figure 5e).

615 Moreover, we decreased the polymorphisms through *XRCC4* deficiency significantly  
616 compared with ExI (Figure 6a). *XRCC4* deficiency also decreased in kinds of happening  
617 polymorphisms compared to the overexpression of *CtIP* and *MRE11* throughout the homologous  
618 recombinant development (Figure 6a and b). Altogether, NHEJ deficiency caused to improve the  
619 HDR efficiency in poplar meaningfully.

620 In summary, we have proved that *XRCC4* deficiency can promote HDR, therefore greatly  
621 expanding our capacity to improve hereditary developments in poplar. This breakthrough  
622 technology is likely to encourage biotechnological researches, breeding programs, and forest  
623 conservation of tree species.

## 624 **Supplementary information**

625 Supplemental information is available for this paper.

## 626 **Funding**

627 This project was funded by the National Key Program on Transgenic Research  
628 (2018ZX08020002), the National Science Foundation of China (No. 31570650), the Priority

629 Academic Program Development of Jiangsu Higher Education Institutions, the Talent Funding  
630 Project of Nanjing Forestry University (No. 163108059).

### 631 **Author contribution**

632 AM: Conceptualization, Software, Formal analysis, Writing - Original Draft,  
633 Visualization, Project administration, and Funding acquisition; HW Methodology, Formal  
634 analysis, Writing - Review & Editing and Data Curation; ZHC: Conceptualization, Validation,  
635 Data Curation, Writing - Review & Editing; WS, JZ, DL: Validation, Writing - Review &  
636 Editing; LY: Conceptualization, Software, Formal analysis, Visualization, and Funding  
637 acquisition; QZ: Conceptualization, Software, Formal analysis, Visualization, Supervision, and  
638 Funding acquisition.

### 639 **Conflict of interest**

640 The authors declare that they have no conflict of interest.

### 641 **Acknowledgment**

642 We thank all researchers, especially professor Zhong-Hua Chen, to improve this research  
643 with their directions.

644

### 645 **References**

- 646 **Butler NM, Baltes NJ, Voytas DF, Douches DS. 2016.** Geminivirus-Mediated Genome Editing  
647 in Potato (*Solanum tuberosum* L.) Using Sequence-Specific Nucleases. *Front Plant Sci* **7**:  
648 1045.
- 649 **Cermak T, Baltes NJ, Cegan R, Zhang Y, Voytas DF. 2015.** High-frequency, precise  
650 modification of the tomato genome. *Genome Biol* **16**: 232.
- 651 **Dahan-Meir T, Filler-Hayut S, Melamed-Bessudo C, Bocobza S, Czosnek H, Aharoni A,**  
652 **Levy AA. 2018.** Efficient in planta gene targeting in tomato using geminiviral replicons and  
653 the CRISPR/Cas9 system. *Plant J* **95**: 5–16.
- 654 **Doench JG, Hartenian E, Graham DB, Tothova Z, Hegde M, Smith I, Sullender M, Ebert**  
655 **BL, Xavier RJ, Root DE. 2014.** Rational design of highly active sgRNAs for CRISPR-Cas9-  
656 mediated gene inactivation. *Nat Biotechnol* **32**: 1262–1267.
- 657 **Friesner J, Britt AB. 2003.** Ku80- and DNA ligase IV-deficient plants are sensitive to ionizing  
658 radiation and defective in T-DNA integration. *Plant J* **34**: 427–440.

- 659 **Gil-Humanes J, Wang Y, Liang Z, Shan Q, Ozuna CV, Sanchez-Leon S, Baltes NJ, Starker**  
660 **C, Barro F, Gao C *et al.* 2017.** High-efficiency gene targeting in hexaploid wheat using DNA  
661 replicons and CRISPR/Cas9. *Plant J* **89**: 1251–1262.
- 662 **Grawunder U, Zimmer D, Fugmann S, Schwarz K, Lieber MR. 1998a.** DNA ligase IV is  
663 essential for V(D)J recombination and DNA double-strand break repair in human precursor  
664 lymphocytes. *Mol Cell* **2**: 477–484.
- 665 **Grawunder U, Zimmer D, Kulesza P, Lieber MR. 1998b.** Requirement for an interaction of  
666 XRCC4 with DNA ligase IV for wild-type V(D)J recombination and DNA double-strand  
667 break repair in vivo. *J Biol Chem* **273**: 24708–24714.
- 668 **Hajiahmadi Z, Movahedi A, Wei H, Li DW, Orooji Y, Ruan HH, Zhuge Q. 2019.** Strategies  
669 to Increase On-Target and Reduce Off-Target Effects of the CRISPR/Cas9 System in Plants.  
670 *International Journal of Molecular Sciences* **20**.
- 671 **Hsu PD, Scott DA, Weinstein JA, Ran FA, Konermann S, Agarwala V, Li Y, Fine EJ, Wu**  
672 **X, Shalem O *et al.* 2013.** DNA targeting specificity of RNA-guided Cas9 nucleases. *Nat*  
673 *Biotechnol* **31**: 827–832.
- 674 **Hummel AW, Chauhan RD, Cermak T, Mutka AM, Vijayaraghavan A, Boyher A, Starker**  
675 **CG, Bart R, Voytas DF, Taylor NJ. 2018.** Allele exchange at the EPSPS locus confers  
676 glyphosate tolerance in cassava. *Plant Biotechnol J* **16**: 1275–1282.
- 677 **Li J, Hong S, Chen W, Zuo E, Yang H. 2019.** Advances in detecting and reducing off-target  
678 effects generated by CRISPR-mediated genome editing. *J Genet Genomics*. doi:  
679 10.1016/j.jgg.2019.11.002.
- 680 **Li Z, Liu ZB, Xing A, Moon BP, Koellhoffer JP, Huang L, Ward RT, Clifton E, Falco SC,**  
681 **Cigan AM. 2015.** Cas9-Guide RNA Directed Genome Editing in Soybean. *Plant Physiol* **169**:  
682 960–970.
- 683 **Maruyama T, Dougan SK, Truttman MC, Bilate AM, Ingram JR, Ploegh HL. 2015.**  
684 Increasing the efficiency of precise genome editing with CRISPR-Cas9 by inhibition of  
685 nonhomologous end joining. *Nat Biotechnol* **33**: 538–542.
- 686 **Movahedi A, Zhang JX, Amirian R, Zhuge Q. 2014.** An Efficient Agrobacterium-Mediated  
687 Transformation System for Poplar. *International Journal of Molecular Sciences* **15**: 10780–  
688 10793.

- 689 **Movahedi A, Zhang JX, Gao PH, Yang Y, Wang LK, Yin TM, Kadkhodaei S, Ebrahimi M,**  
690 **Qiang ZG. 2015.** Expression of the chickpea CarNAC3 gene enhances salinity and drought  
691 tolerance in transgenic poplars. *Plant Cell Tissue and Organ Culture* **120**: 141–154.
- 692 **Panier S, Boulton SJ. 2014.** Double-strand break repair. 53BP1 comes into focus. *Nat Rev Mol*  
693 *Cell Biol* **15**: 7–18.
- 694 **Pierce AJ, Hu P, Han M, Ellis N, Jasin M. 2001.** Ku DNA end-binding protein modulates  
695 homologous repair of double-strand breaks in mammalian cells. *Genes Dev* **15**: 3237–3242.
- 696 **Puchta H. 2005.** The repair of double-strand breaks in plants. mechanisms and consequences for  
697 genome evolution. *J Exp Bot* **56**: 1–14.
- 698 **Sambrook J, Fritsch EF, Maniatis T. 1989.** Molecular cloning. a laboratory manual. Cold  
699 Spring Harbor, NY: Cold Spring Harbor Laboratory Press.
- 700 **Shi J, Gao H, Wang H, Lafitte HR, Archibald RL, Yang M, Hakimi SM, Mo H, Habben JE.**  
701 **2017.** ARGOS8 variants generated by CRISPR-Cas9 improve maize grain yield under field  
702 drought stress conditions. *Plant Biotechnol J* **15**: 207–216.
- 703 **Song F, Stieger K. 2017.** Optimizing the DNA Donor Template for Homology-Directed Repair  
704 of Double-Strand Breaks. *Mol Ther Nucleic Acids* **7**: 53–60.
- 705 **Sun Y, Zhang X, Wu C, He Y, Ma Y, Hou H, Guo X, Du W, Zhao Y, Xia L. 2016.**  
706 Engineering Herbicide-Resistant Rice Plants through CRISPR/Cas9-Mediated Homologous  
707 Recombination of Acetolactate Synthase. *Mol Plant* **9**: 628–631.
- 708 **Svitashev S, Schwartz C, Lenderts B, Young JK, Cigan AM. 2016.** Genome editing in maize  
709 directed by CRISPR-Cas9 ribonucleoprotein complexes. *Nature Communications* **7**.
- 710 **Svitashev S, Young JK, Schwartz C, Gao H, Falco SC, Cigan AM. 2015.** Targeted  
711 Mutagenesis, Precise Gene Editing, and Site-Specific Gene Insertion in Maize Using Cas9 and  
712 Guide RNA. *Plant Physiol* **169**: 931–945.
- 713 **Tran NT, Bashir S, Li X, Rossius J, Chu VT, Rajewsky K, Kuhn R. 2019.** Enhancement of  
714 Precise Gene Editing by the Association of Cas9 With Homologous Recombination Factors.  
715 *Frontiers in Genetics* **10**.
- 716 **Wang MG, Lu YM, Botella JR, Mao YF, Hua K, Zhu JK. 2017.** Gene Targeting by  
717 Homology-Directed Repair in Rice Using a Geminivirus-Based CRISPR/Cas9 System.  
718 *Molecular Plant* **10**: 1007–1010.

719 **Wu J, Yin H. 2019.** Engineering guide RNA to reduce the off-target effects of CRISPR. *J Genet*  
720 *Genomics*. doi: 10.1016/j.jgg.2019.11.003.

721 **Xie KB, Yang YN. 2013.** RNA-Guided Genome Editing in Plants Using a CRISPR/Cas System.  
722 *Molecular Plant* **6**: 1975–1983.

723 **Yang D, Scavuzzo MA, Chmielowiec J, Sharp R, Bajic A, Borowiak M. 2016.** Enrichment of  
724 G2/M cell cycle phase in human pluripotent stem cells enhances HDR-mediated gene repair  
725 with customizable endonucleases. *Sci Rep* **6**: 21264.

726 **Zhang JP, Li XL, Li GH, Chen W, Arakaki C, Botimer GD, Baylink D, Zhang L, Wen W,**  
727 **Fu YW et al. 2017.** Efficient precise knockin with a double cut HDR donor after  
728 CRISPR/Cas9-mediated double-stranded DNA cleavage. *Genome Biol* **18**: 35.

## 729 **Figure legends**

730 **Figure 1:** Schematics of *MKK2* locus before and after edition and integration of  
731 exogenous BleoR protein into the poplar genome **(a)** Schematic of the purpose of this research to  
732 integrate exogenous BleoR into the poplar genome. Dash line reveals the target site. **(b)**  
733 Protospacer Adjacent Motif (PAM) was detected at the end of exon 8 to lead Cas9. 400 bp  
734 sequences from both sides of the CRISPR target were selected for HDR in this study. The 5'  
735 homology arm included part sequences of the intron between exon 6 and -7, exon 7, intron  
736 sequences between exon 7 and -8, and a part of exon 8. The 3' homology arm included intron  
737 sequences between exon 8 and -9 and 3' UTR of the *MKK2* locus up to 400 bp. Designed DDT  
738 included remained sequences of exon 8, exon 9, BleoR CDS, 6xHis, and PolyA sequences  
739 flanked by the 3'- and 5' homology arms. We added two special targets besides DDT. The DDT  
740 was then ligated into the pRGEB31 vector to form pDDT.

741 **Figure 2:** The transformation strategy and designing of experiments. **(a)** pDDT and  
742 pgRNA were mixed 4:1 and introduced to the *Agrobacterium tumefaciens* to form inoculator  
743 suspension. We condensed inoculator up to OD<sub>600</sub>=2.5 and then dipped all cut off stems. **(b)** The  
744 putatively edited events were regenerated on Zeocin. We allowed putative edited events to bud.  
745 The elongated buds were then transferred on rooting media and allowed to be  
746 recovered. **(c)** Designed experiments for this study including (I) No HDR factors, (II) overloaded  
747 CtIP, (III) overloaded MRE11, (IV) Overloaded CtIP+MRE11, and (V) Overloaded  
748 CtIP+MRE11 with *XRCC4* deficiency.



749 **Figure 3:** Western blotting to reveal the fused 6xHis tag with BleoR integration into the  
750 poplar genome. **(a)** Different experiments exhibited different quantities of 6xHis tag fusion. **(b)**  
751 Schematic of fusion 6xHis tag with edited poplar genome triggered by different experiments.  
752 The shape **a** reveals successful fusion of *BleoR* and *MKK2* with about 54 kDa. The shape **b**  
753 reveals an unsuccessful combination of mentioned proteins with about 14 kDa **(c)** Schematic of  
754 right HDR happening caused to attach exon 8 and 9 in the edited genome. **(d)** Schematic of  
755 proper integration in edited genome caused to connect the BleoR to the C-terminal of MKK2. **(e)**  
756 RT-PCR exhibited the HDR in exon 8 and 9, revealing a 920 bp of transcribed *MKK2* RNA in  
757 triggered events from ExII to ExV. The  $\beta$ -actin was used as the control in all RT-PCR assays;  
758 WT was used as a positive control. **(f)** RT-PCR revealed that BleoR CDS was adequately  
759 inserted in the target region with amplifying 413 bp of transcribed RNA in the recovered events.  
760 The  $\beta$ -actin was used as the control in all RT-PCR assays; BleoR protein extracted from pDDT  
761 plasmid was used as the positive control. WT was used as the negative control. **(g)** Schematic of  
762 probing BleoR in edited events and WT as the control using Southern blotting. **(h)** Southern blot  
763 proved that *BleoR* CDS was integrated into the precise recombinant genome. Digested pDDT  
764 plasmid was used as positive control.

765 **Figure 4:** The 2D kernel density plot of TaqMan real-time PCR fluorescent intensities  
766 and HDR efficiency percentage. **(a)** The TaqMan real-time PCR assay designing to detect HDR  
767 happened, and evaluation included FAM1 and FAM2 DNA binding probes. **(b)** Strategy to  
768 classify edited events. **(c)** Experiment I revealed no density for the edited events. **(d)** The density  
769 plot of FAM1 and -2 intensities resulted from experiment II revealed an expansion in edited  
770 events against partial, mutant, and wild-types. **(e)** The density plot of FAM1 and -2  $\Delta\Delta C_t$   
771 resulted from experiment III revealed an increased intensity of partial FAM1 events. **(f)**  
772 Experiment IV revealed a remarkable increase of edited events signals in confronting with three  
773 earlier experiments. **(g)** The Density plot of experiment V revealed a significant increase of  
774 FAM1 and -2 intensities in edited events compared to the earlier experiments and a significant  
775 decrease in intensities in WT and mutated events. All samples were analyzed in quadruplicate. **(h)**  
776 Diamond box and whisker plot revealed the identification of all FAM signals visualized in the  
777 experiments and showed more signals remarkably measured in ExV than ExI, II, and-III; Error  
778 bars represent SE; Asterisks represent p-value as  $*\leq 0.05$ ,  $**\leq 0.01$ , and  $***\leq 0.001$ . **(i)** The bar  
779 plot represents the HDR efficiency in different experiments; The overlap data are shown as bin

780 bars, and the standard distribution curves are added. HDR efficiency plot revealed that *XRCC4*  
781 deficient (ExV) led to HDR happening significantly more than the fusion of CtIP (ExII), MRE11  
782 (ExIII), and CtIP+MRE11 (ExV). Also, ExIV meaningfully revealed more HDR happening than  
783 ExII and -III.; Error bars represent SE; Asterisks represent p-value as  $**\leq 0.01$ ,  $***\leq 0.001$ , and  
784  $****\leq 0.0001$ ; Triplicate technical repeats were considered for each sample.

785 **Figure 5:** Violin plots reveal the *BleoR* and *MKK2* expression and the success happening  
786 HDR via different experiments. (a-e) The differences between *BleoR* and *MKK2* expression.  
787 Three technical repeats were used for each event in this assay; Dash lines present quartiles; Solid  
788 lines present median. (f) Heat-map to show the effect of efficient HDR on the expression of  
789 NHEJ and HDR factors. Overexpression *CtIP* and/or *MRE11* caused to enhance the expression  
790 of *BRCA1*, *Rad50*, and *Rad51* and to demote the expression of *Lig4* and *XRCC4*. The highest  
791 expression of the HDR factors visualized in ExV means that *XRCC4* deficiency decreased the  
792 expression of NHEJ factor *Lig4* and intensified HDR efficiency. Triplicate technical repeats  
793 were considered for each sample.

794 **Figure 6:** Polymorphisms happened in this study. (a) Identification of the polymorphisms  
795 happened in homology arms through the experiments. Box and Whisker plot revealed that most  
796 polymorphisms happened in homology arms by ExI, and it was significantly more than those in  
797 ExV and -IV; Asterisks represent p-value as  $*\leq 0.05$ ; Error bars represent SE. (b) Stacked  
798 column plot of total polymorphisms happened in DDT integration into the poplar genome.  
799 Deletion and insertion occurred much more than the other types. SNP and substitution occurred  
800 less than the other types. Whisker and standard distribution curves exposed that the total  
801 polymorphisms caused by *XRCC4* deficiency were less than the other experiments.

## 802 **Supplementary data**

803 **Supplementary 1:** Schematic of pgRNA, DDT, and pDDT. (a) pgRNA included the  
804 *MKK2* target seed and Cas9. (b) pDDT included DDT ligated into pRGEB31 by restriction  
805 enzyme cloning method.

806 **Supplementary 2:** Schematic construction of DDT and pDDT fragments, primers, and  
807 oligos.

808 **Supplementary 3:** Schematic construction of CtIP, MRE11, CtIP+MRE11, and *XRCC4*  
809 cassette primers and oligos.

810           **Supplementary 4:** Schematic construction of cassettes (CtIP and MR) and vectors  
811 (pgCtIP and pgMR) and their primers.

812           **Supplementary 5 :** Schematics of constructed cassettes and plasmids. **(a)** pgCtIP  
813 plasmid including CtIP cassette. **(b)** pgMR plasmid including MR cassette. **(c)** pgCtMR plasmid  
814 including CtMR cassette. **(d)** pggCtMR plasmid including XRCC4 cassette.

815           **Supplementary 6:** Schematic construction of cassettes (CtMR, XRCC4) and vectors  
816 (pgCtMR and pggCtMR) and their primers.

817           **Supplementary 7:** Alignment of events involved in experiment I.

818           **Supplementary 8:** Alignment of events involved in experiment II.

819           **Supplementary 9:** Alignment of events involved in experiment III.

820           **Supplementary 10:** Alignment of events involved in experiment IV.

821           **Supplementary 11:** Alignment of events involved in experiment V.

822           **Supplementary 12:** Schematic of TaqMan real-time PCR FAM and VIC target assays in  
823 this study. Yellow rectangles exhibited CDS.

824           **Supplementary 13:** Box-and-whisker (Min-Max) plots of one-dimensional FAM delta-  
825 delta Ct signals in designed experiments. All signals were calculated as quadruplicates.

826           **Supplementary 14:** Schematics of sequence analyzing of triggered events from different  
827 experiments. **(a)** Sequence analysis of triggered events included in EXII reveals one recovered  
828 event. **(b)** Sequence analysis of triggered events included in EXIII reveals one recovered event.  
829 **(c)** Sequence analysis of triggered events included in EXIV reveals four recovered events. **(d)**  
830 Sequence analysis of triggered events included in EXV reveals 12 recovered events.

831           **Supplementary 15:** The raw data of real-time PCR evaluates the percentage of delta-  
832 delta Ct mean from *BleoR* in all experiments. **(a)** Delta-delta Ct mean of *BleoR* expression from  
833 grown buds. Each sample was investigated with three technical repeats. **(b)** Descriptive statistic  
834 table of raw data calculated by ANOVA-One way.

835           **Supplementary 16:** Column plots of the expression of integrated *BleoR* and new  
836 recombinant *MKK2* genes via different designed experiments. Three technical repeats were used  
837 for each event in this assay; Error bars represent SD; WT and pDDT were used as the control for  
838 *MKK2* and *BleoR* expression, respectively.

839           **Supplementary 17:** Chromatogram alignments of events included in experiment V.

840 **Supplementary Table**

841 **Supplementary Table 1:** CRISPR sites located on 3' region of *MKK2*. The yellow  
842 highlight reveals the selected CRISPR target in this study.

843 **Supplementary Table 2:** Oligos and primers used in this study.

844 **Supplementary Table 3:** All polymorphisms detected in homology arms happened by  
845 HDR through experiments.

846 **Supplementary Table 4:** Variant nucleotides happened from experiments.

847

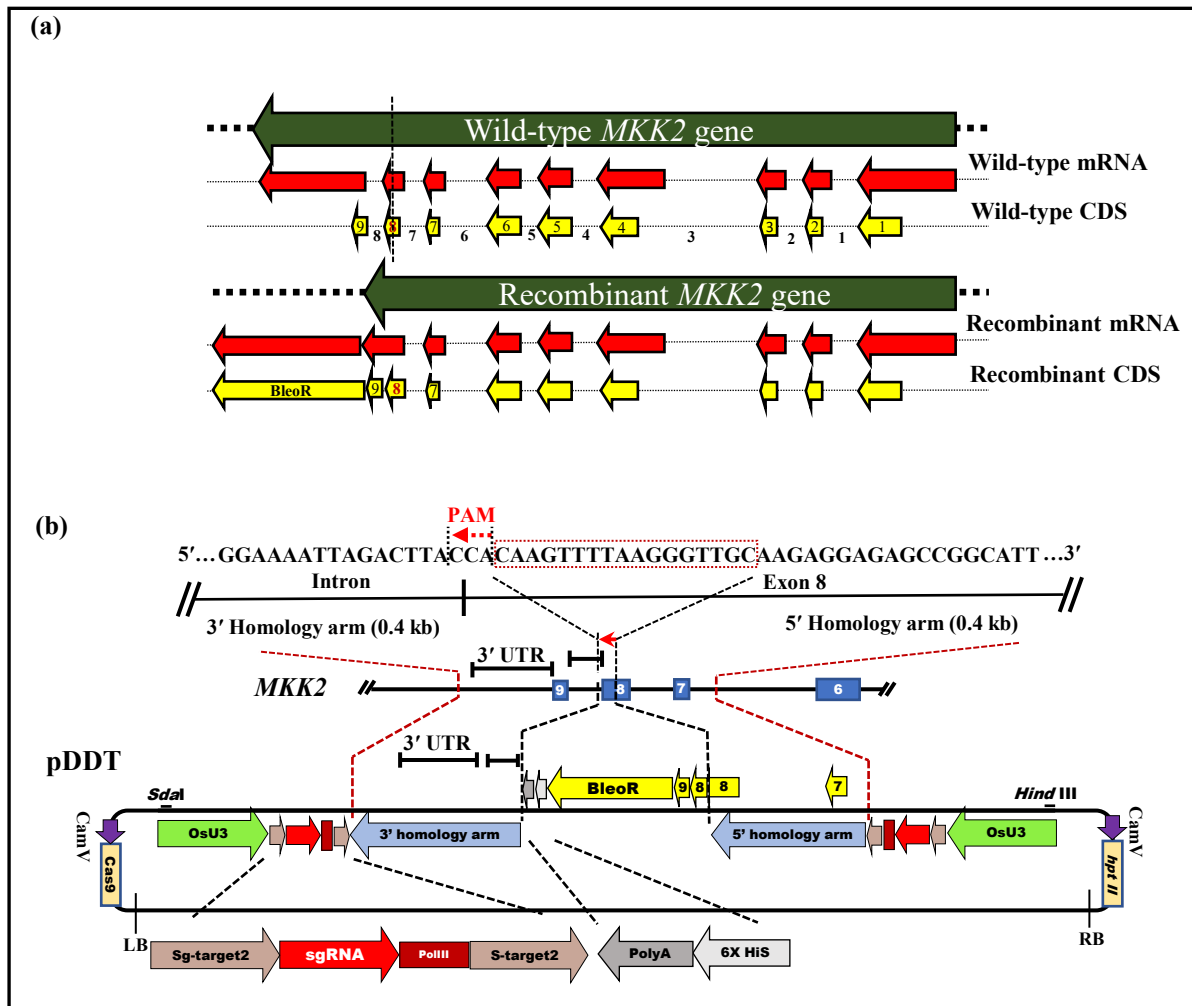

**Figure 1:** Schematics of *MKK2* locus before and after edition and integration of exogenous BleoR protein into the poplar genome (a) Schematic of the purpose of this research to integrate exogenous BleoR into the poplar genome. Dash line reveals the target site. (b) Protospacer Adjacent Motif (PAM) was detected at the end of exon 8 to lead Cas9. 400 bp sequences from both sides of the CRISPR target were selected for HDR in this study. The 5' homology arm included part sequences of the intron between exon 6 and -7, exon 7, intron sequences between exon 7 and -8, and a part of exon 8. The 3' homology arm included intron sequences between exon 8 and -9 and 3' UTR of the *MKK2* locus up to 400 bp. Designed DDT included remained sequences of exon 8, exon 9, BleoR CDS, 6xHis, and PolyA sequences flanked by the 3'- and 5' homology arms. We added two special targets besides DDT. The DDT was then ligated into the pRGEB31 vector to form pDDT.

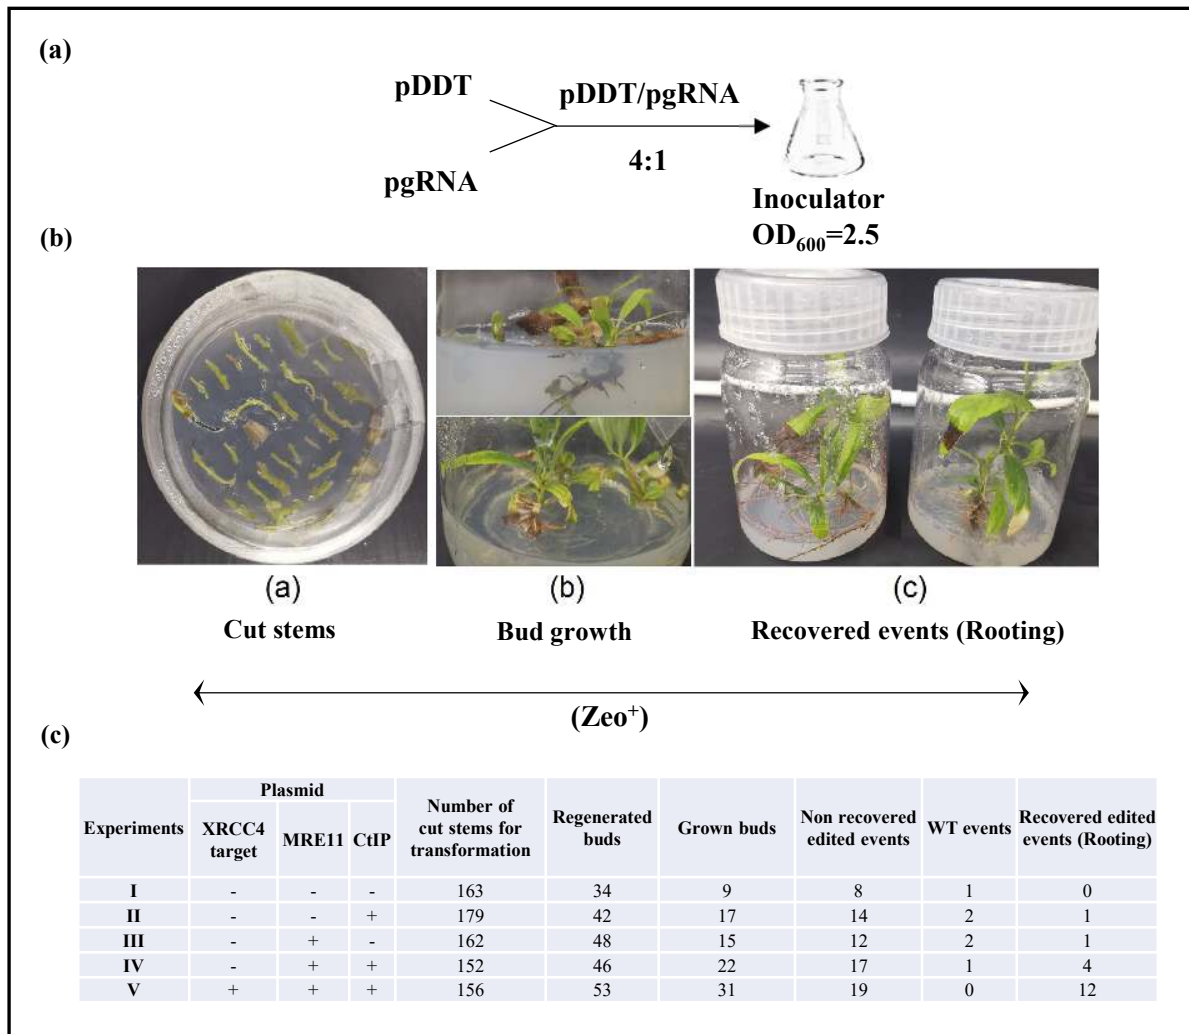

**Figure 2:** The transformation strategy and designing of experiments. **(a)** pDDT and pgRNA were mixed 4:1 and introduced to the *Agrobacterium tumefaciens* to form inoculator suspension. We condensed inoculator up to  $OD_{600}=2.5$  and then dipped all cut off stems. **(b)** The putatively edited events were regenerated on Zeocin. We allowed putative edited events to bud. The elongated buds were then transferred on rooting media and allowed to be recovered. **(c)** Designed experiments for this study including (I) No HDR factors, (II) overloaded CtIP, (III) overloaded MRE11, (IV) Overloaded CtIP+MRE11, and (V) Overloaded CtIP+MRE11 with *XRCC4* deficiency.

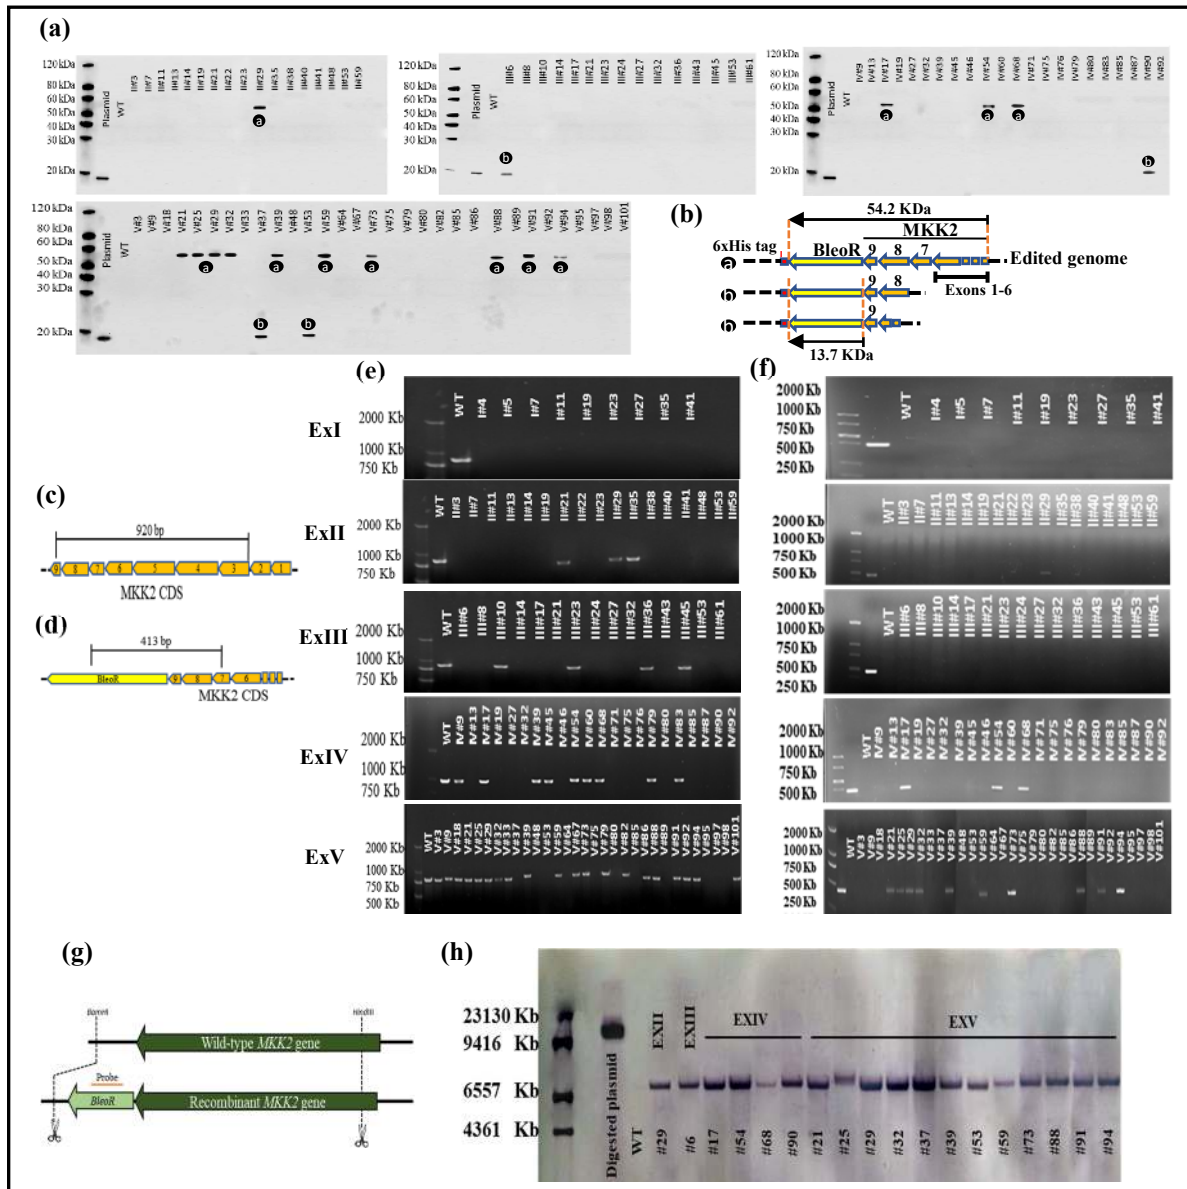

**Figure 3:** Western blotting to reveal the fused 6xHis tag with BleoR integration into the poplar genome. **(a)** Different experiments exhibited different quantities of 6xHis tag fusion. **(b)** Schematic of fusion 6xHis tag with edited poplar genome triggered by different experiments. The shape **a** reveals successful fusion of *BleoR* and *MKK2* with about 54 kDa. The shape **b** reveals an unsuccessful combination of mentioned proteins with about 14 kDa **(c)** Schematic of right HDR happening caused to attach exon 8 bp and 9 in the edited genome. **(d)** Schematic of proper integration in edited genome caused to connect the BleoR to the C-terminal of *MKK2*. **(e)** RT-PCR exhibited the HDR in exon 8 and 9, revealing a 920 bp of transcribed *MKK2* RNA in triggered events from ExII to ExV. The  $\beta$ -actin was used as the control in all RT-PCR assays; WT was used as a positive control. **(f)** RT-PCR revealed that *BleoR* CDS was adequately inserted in the target region with amplifying 413 bp of transcribed RNA in the recovered events. The  $\beta$ -actin was used as the control in all RT-PCR assays; *BleoR* protein extracted from pDDT plasmid was used as the positive control. WT was used as the negative control. **(g)** Schematic of probing *BleoR* in edited events and WT as the control using Southern blotting. **(h)** Southern blot proved that *BleoR* CDS was integrated into the precise recombinant genome. Digested pDDT plasmid was used as positive control.

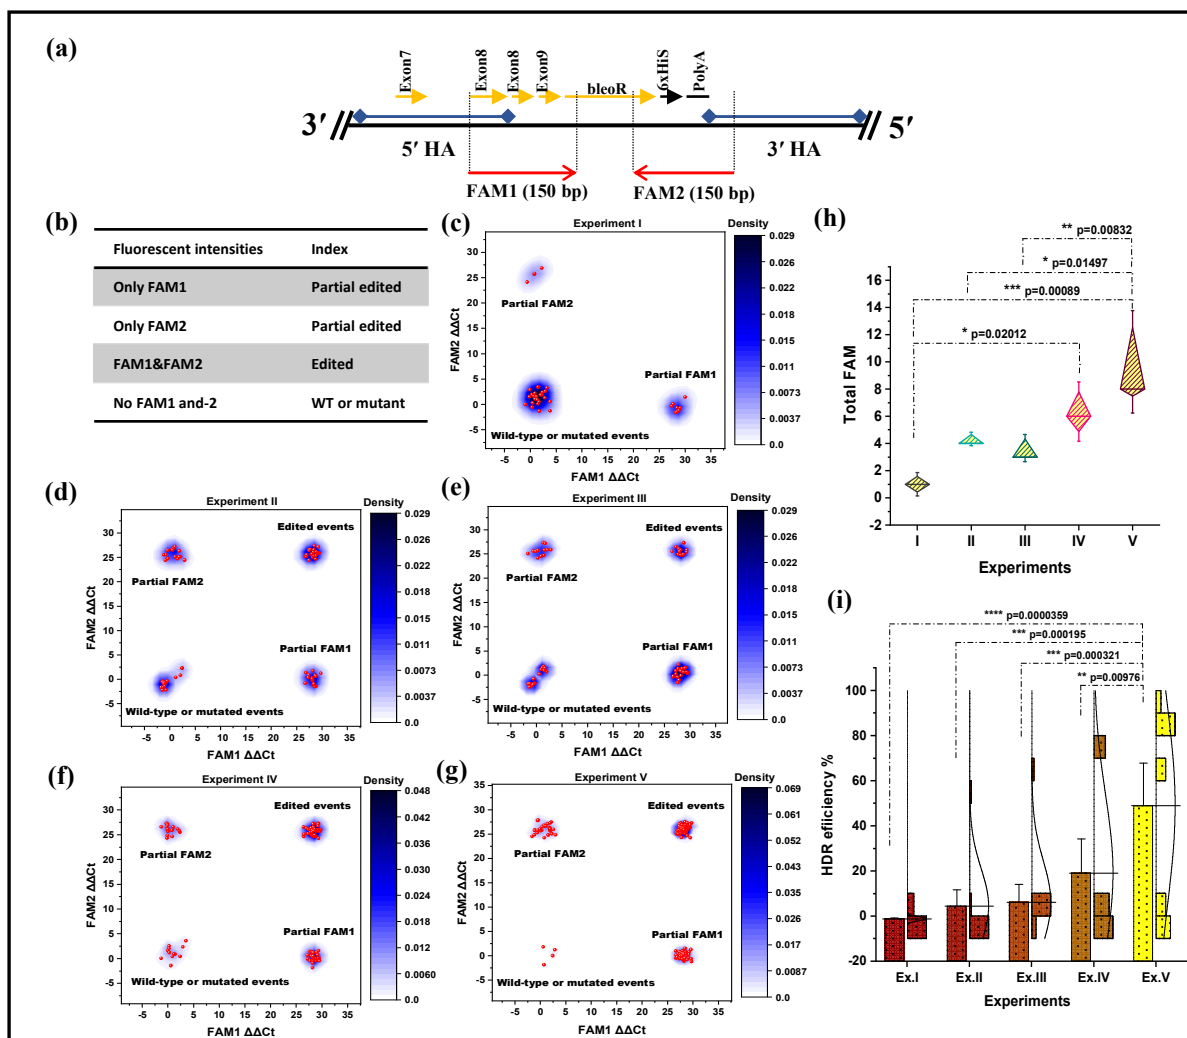

**Figure 4:** The 2D kernel density plot of TaqMan real-time PCR fluorescent intensities and HDR efficiency percentage. **(a)** The TaqMan real-time PCR assay designing to detect HDR happened, and evaluation included FAM1 and FAM2 DNA binding probes. **(b)** Strategy to classify edited events. **(c)** Experiment I revealed no density for the edited events. **(d)** The density plot of FAM1 and -2 intensities resulted from experiment II revealed an expansion in edited events against partial, mutant, and wild-types. **(e)** The density plot of FAM1 and -2  $\Delta\Delta Ct$  resulted from experiment III revealed an increased intensity of partial FAM1 events. **(f)** Experiment IV revealed a remarkable increase of edited events signals in confronting with three earlier experiments. **(g)** The Density plot of experiment V revealed a significant increase of FAM1 and -2 intensities in edited events compared to the earlier experiments and a significant decrease in intensities in WT and mutated events. All samples were analyzed in quadruplicate. **(h)** Diamond box and whisker plot revealed the identification of all FAM signals visualized in the experiments and showed more signals remarkably measured in ExV than ExI, II, and-III; Error bars represent SE; Asterisks represent p-value as \* $\leq 0.05$ , \*\* $\leq 0.01$ , and \*\*\* $\leq 0.001$ . **(i)** The bar plot represents the HDR efficiency in different experiments; The overlap data are shown as bin bars, and the standard distribution curves are added. HDR efficiency plot revealed that *XRCC4* deficient (ExV) let to HDR happening significantly more than the fusion of CtIP (ExII), MRE11 (ExIII), and CtIP+MRE11 (ExV). Also, ExIV meaningfully revealed more HDR happening than ExII and -III.; Error bars represent SE; Asterisks represent p-value as \*\* $\leq 0.01$ , \*\*\* $\leq 0.001$ , and \*\*\*\* $\leq 0.0001$ ; Triplicate technical repeats were considered for each sample.



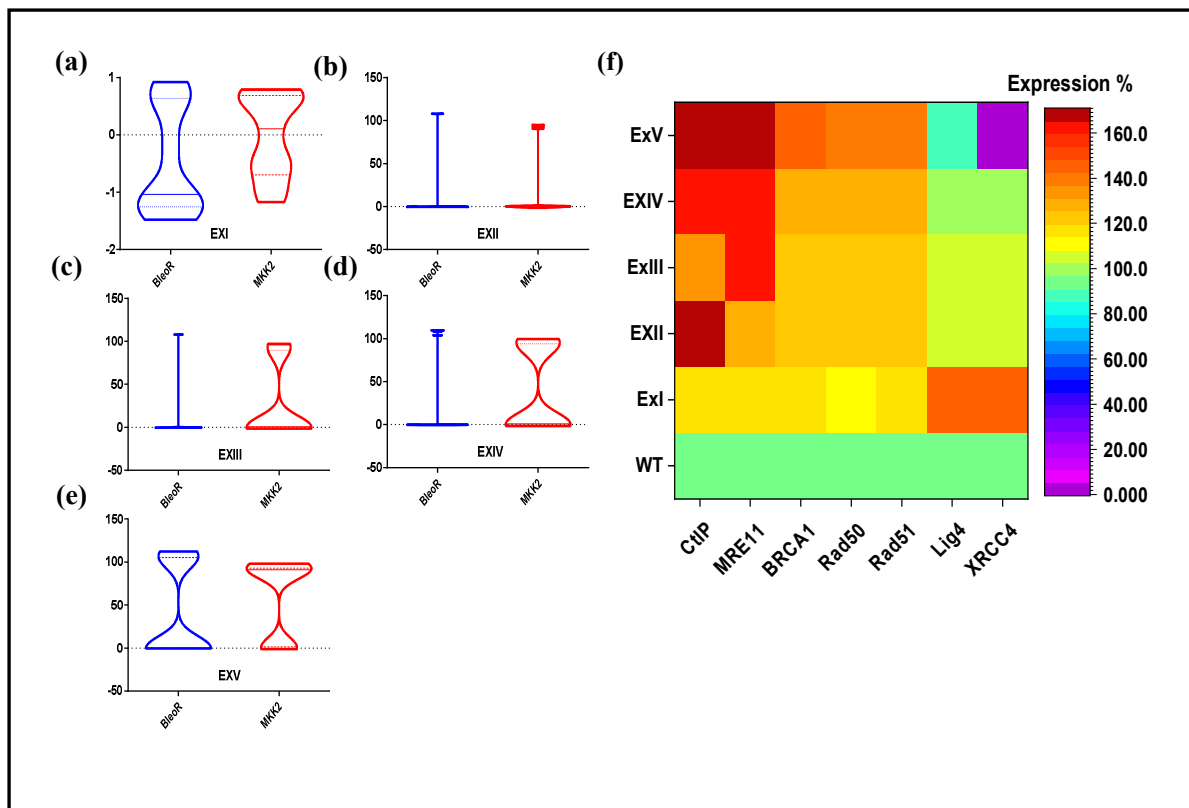

**Figure 5:** Violin plots reveal the *BleoR* and *MKK2* expression and the success happening HDR via different experiments. (a-e) The differences between *BleoR* and *MKK2* expression. Three technical repeats were used for each event in this assay; Dash lines present quartiles; Solid lines present median. (f) Heat-map to show the effect of efficient HDR on the expression of NHEJ and HDR factors. Overexpression *CtIP* and/or *MRE11* caused to enhance the expression of *BRCA1*, *Rad50*, and *Rad51* and to demote the expression of *Lig4* and *XRCC4*. The highest expression of the HDR factors visualized in ExV means that *XRCC4* deficiency decreased the expression of NHEJ factor *Lig4* and intensified HDR efficiency. Triplicate technical repeats were considered for each sample.

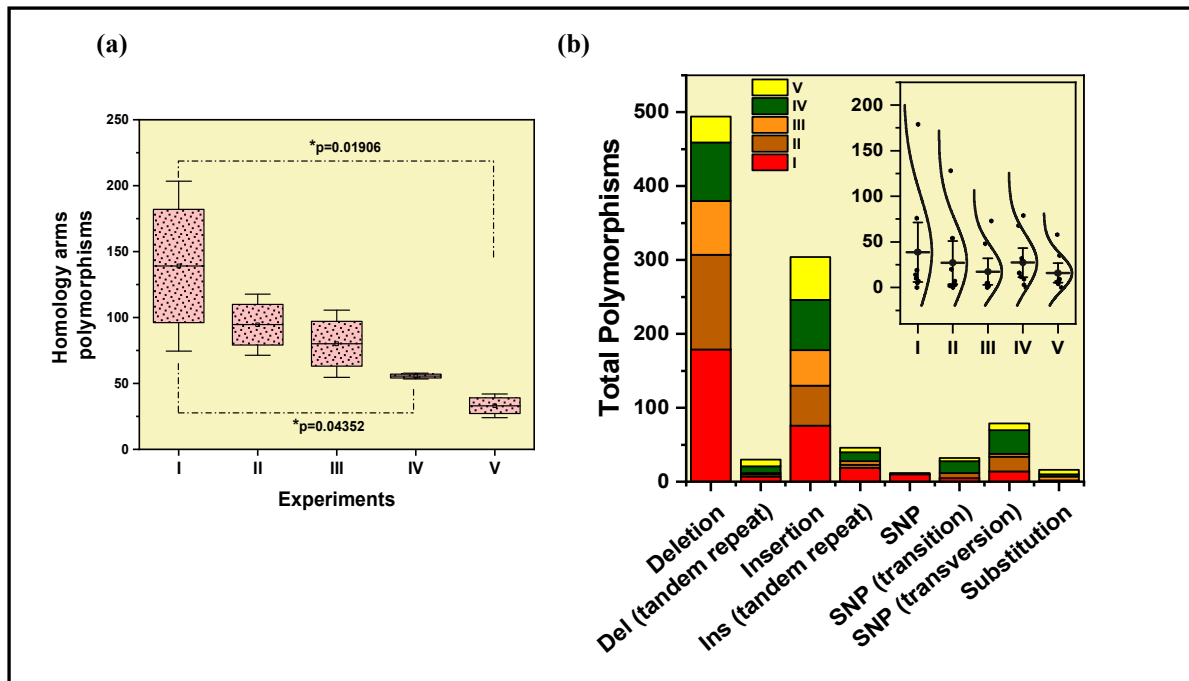

**Figure 6:** Polymorphisms happened in this study. **(a)** Identification of the polymorphisms happened in homology arms through the experiments. Box and Whisker plot revealed that most polymorphisms happened in homology arms by ExI, and it was significantly more than those in ExV and -IV; Asterisks represent p-value as  $*\leq 0.05$ ; Error bars represent SE. **(b)** Stacked column plot of total polymorphisms happened in DDT integration into the poplar genome. Deletion and insertion occurred much more than the other types. SNP and substitution occurred less than the other types. Whisker and standard distribution curves exposed that the total polymorphisms caused by *XRCC4* deficiency were less than the other experiments.
